# Supplementary material for: Construction of a stable fluorescent sensor based on CsPbBr3/CdS core/shell quantum dots for selective and sensitive detection of tetracycline in ethanol
Source: Royal Society of Chemistry journal article supplement (doi:10.1039/d4ay00032c), 2024-01-01
Supplement: d4ay00032c1.pdf [file d4ay00032c1.pdf]

### Supporting Information for:

## Construction of stable fluorescent sensor based on CsPbBr<sub>3</sub>/CdS core/shell quantum dots for selective and sensitive detection of tetracycline in ethanol

Yang He, Yangjie Li, Han Wang, Site Luo, Haihu Yu\*

The National Engineering Research Center of Fiber Optic Sensing Technology and Network,  
Wuhan University of Technology, Wuhan 430070, China.

\*Corresponding authors. E-mail address: hhyu@whut.edu.cn (H. Yu)

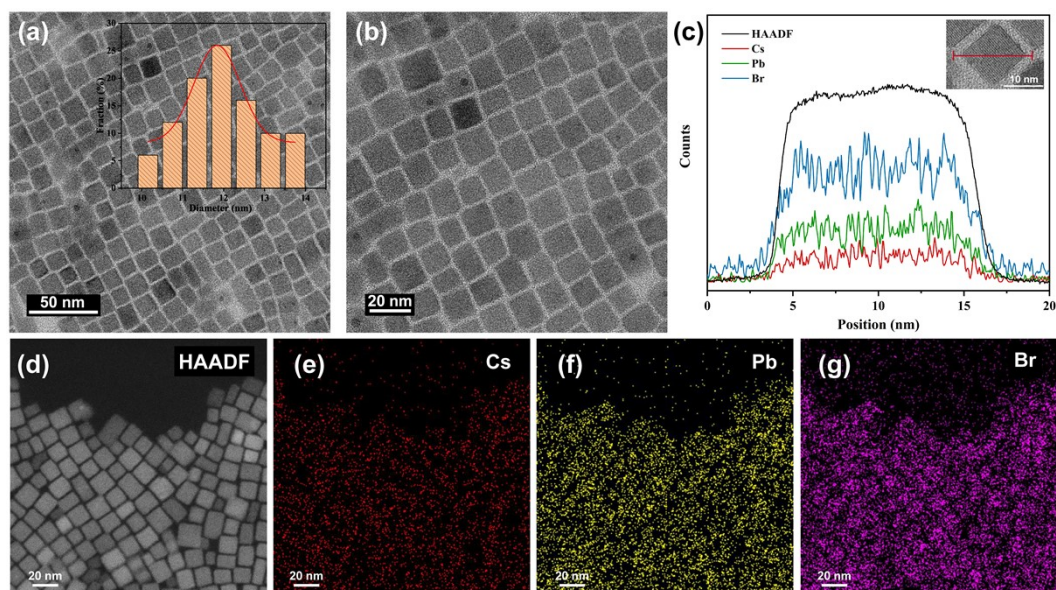

**Fig. S1** (a) TEM image and size distribution of pure CsPbBr<sub>3</sub> QDs. (b) HRTEM image of pure CsPbBr<sub>3</sub> QDs. (c) EDX line profiles of Cs, Pb, and Br. (d-g) Elemental maps showing presence of Cs, Pb, and Br, respectively.

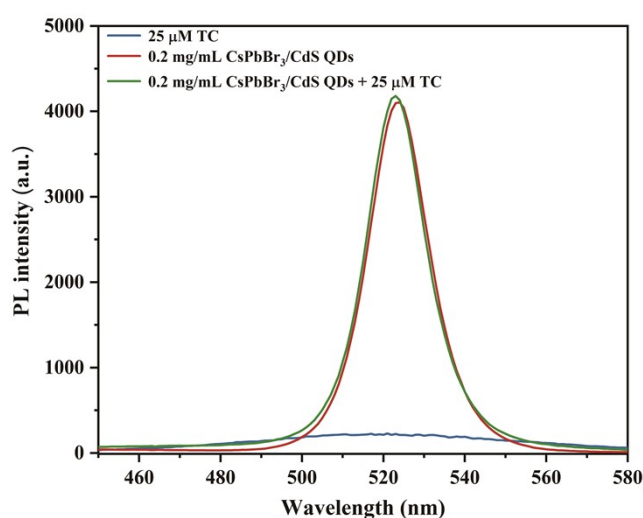

**Fig. S2** Fluorescence emission spectra of 25 μM TC ethanol solution (blue line), 0.2 mg/mL CsPbBr<sub>3</sub>/CdS QDs (red line), and the mixture of 25 μM TC with 0.2 mg/mL CsPbBr<sub>3</sub>/CdS QDs (green line).

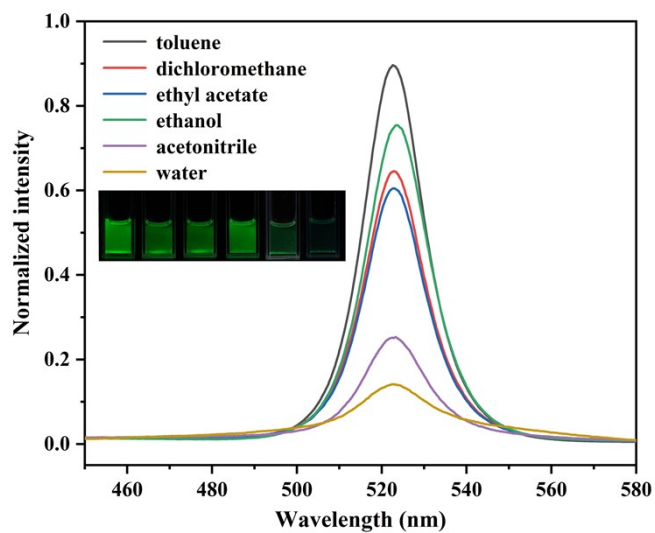

**Fig. S3** Effect of several different polar solvents on the fluorescence intensity of CsPbBr<sub>3</sub>/CdS QDs.

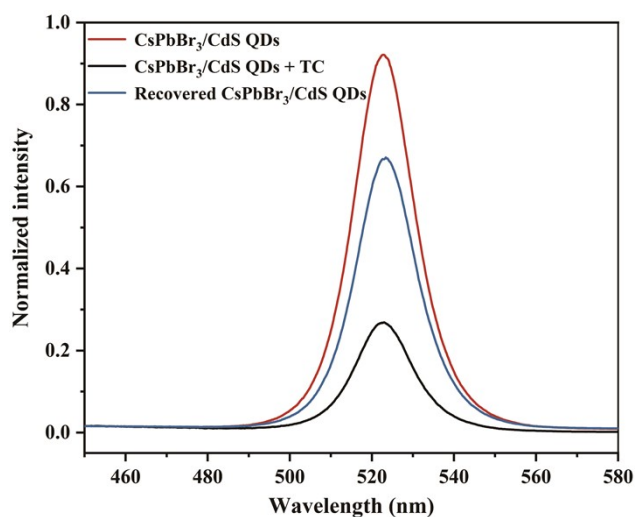

**Fig. S4** Fluorescence emission spectra of CsPbBr<sub>3</sub>/CdS QDs, CsPbBr<sub>3</sub>/CdS QDs with TC (15 μM) and the recovered CsPbBr<sub>3</sub>/CdS QDs.

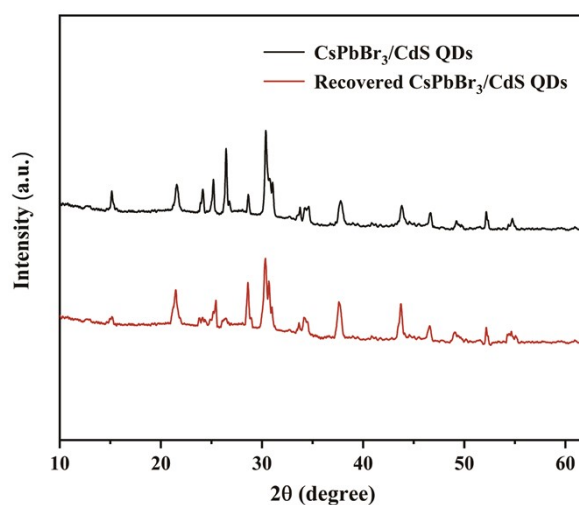

**Fig. S5** XRD patterns of CsPbBr<sub>3</sub>/CdS QDs and the recovered CsPbBr<sub>3</sub>/CdS QDs.
